# Supplementary material for: Synthesis of a branched surfactant from the castor derivative and its surface properties
Source: Royal Society of Chemistry journal article supplement (doi:10.1039/d2cp02298b), 2022-01-01
Supplement: d2cp02298b1.pdf [file d2cp02298b1.pdf]

**Supplementary Information for**

**Synthesis of branched surfactant from castor derivative and its surface properties**

Qingwen Dong <sup>a</sup>, Xu Li <sup>a,\*</sup>, and Jinxiang Dong <sup>a,b,\*</sup>

<sup>a</sup> *College of Chemical Engineering and Technology, Taiyuan University of Technology,  
Taiyuan 030024, Shanxi, China*

<sup>b</sup> *School of Chemical Engineering and Light Industry, Guangdong University of Technology,  
Guangzhou 510006, Guangdong, China*

## **Table of contents**

*SI-1 GC analysis of the synthesized products 12-HSM and its physical image.*

*SI-2 FT-IR spectra of 12-HSM and 12-HMEE<sub>n</sub>.*

*SI-3 <sup>1</sup>H NMR spectrum of 12-HMEE<sub>5</sub>.*

*SI-4. <sup>1</sup>H NMR spectrum of 12-HMEE<sub>5</sub>.*

*SI-5. <sup>1</sup>H NMR spectrum of 12-HMEE<sub>10</sub>.*

*SI-6. <sup>1</sup>H NMR spectrum of 12-HMEE<sub>15</sub>.*

*SI-7. <sup>1</sup>H NMR spectrum of 12-HMEE<sub>20</sub>.*

*SI-8. Equilibrium surface tension of 12-HMEE<sub>n</sub>.*

*SI-9. Dynamic surface tension as a function of short-term ( $t^{1/2}$ ) for the 12-HMEE<sub>n</sub>.*

*SI-10. Dynamic surface tension as a function of long-term ( $t^{1/2}$ ) for the 12-HMEE<sub>n</sub>.*

### SI-1 GC analysis of the synthesized products 12-HSM and its physical image.

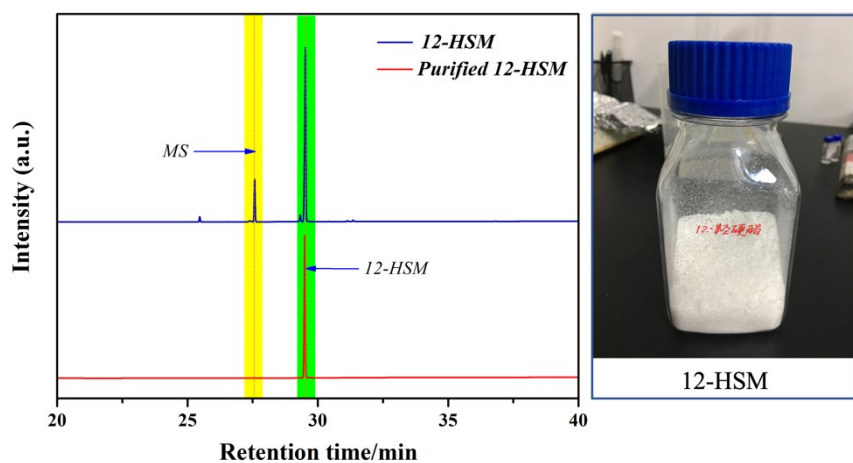

Fig. S1 GC analysis of the synthesized products 12-HSM and its physical image. (MS stands for methyl stearate)

### SI-2 FT-IR spectra of 12-HSM and 12-HMEE<sub>n</sub>

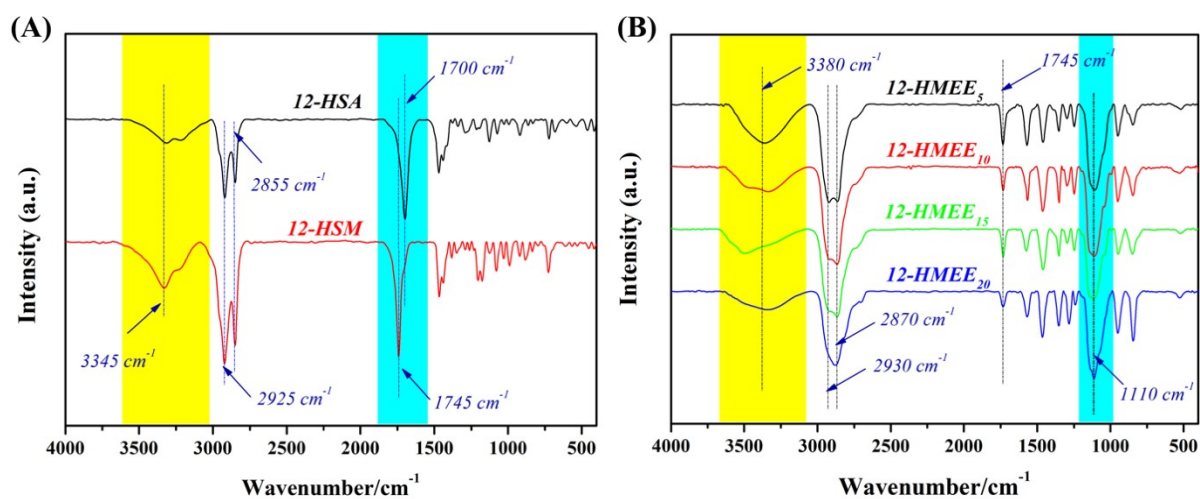

Fig. S2 FT-IR spectra of products: (A) 12-HSM; (B) 12-HMEE<sub>n</sub>.

### SI-3. <sup>1</sup>H NMR spectrum of 12-HSM.

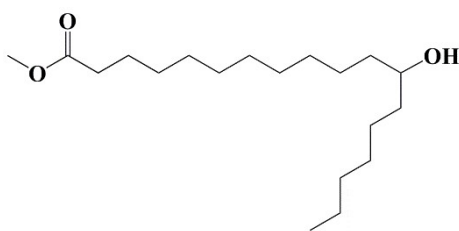

<sup>1</sup>H NMR in CDCl<sub>3</sub>

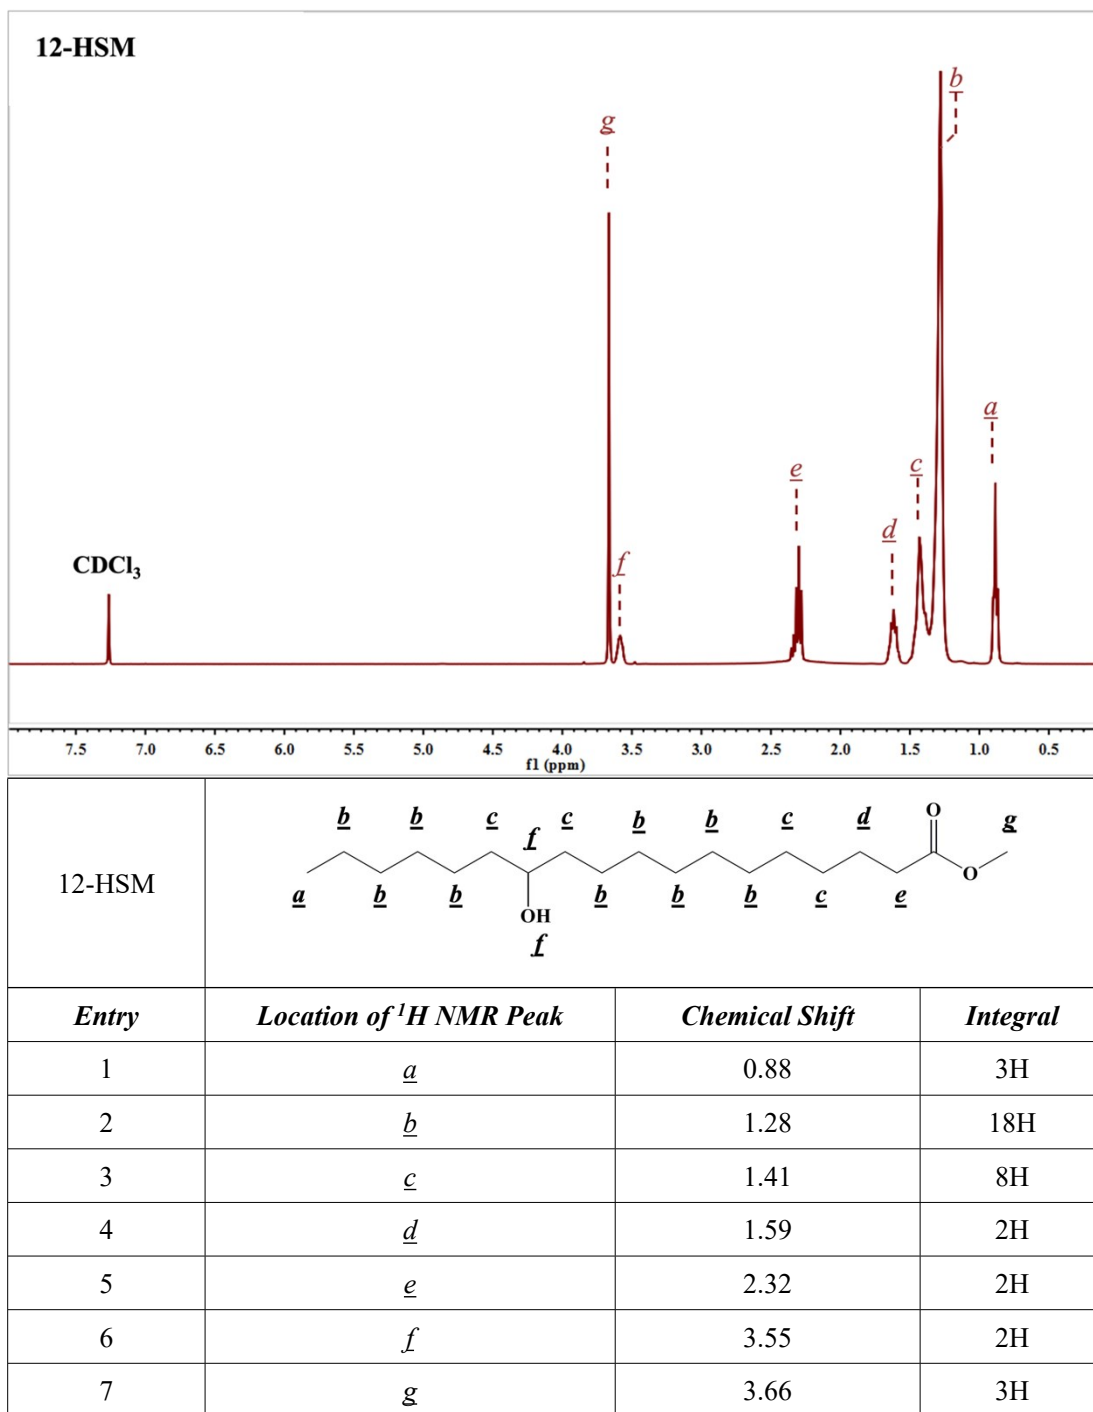

SI-4.  $^1\text{H}$  NMR spectrum of 12-HMEE<sub>5</sub>.

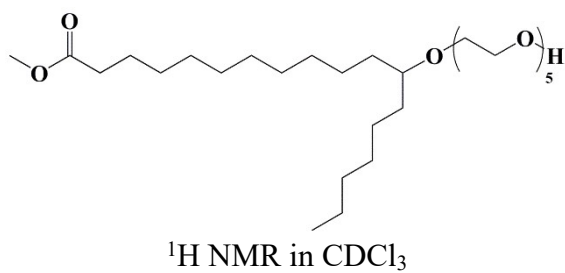

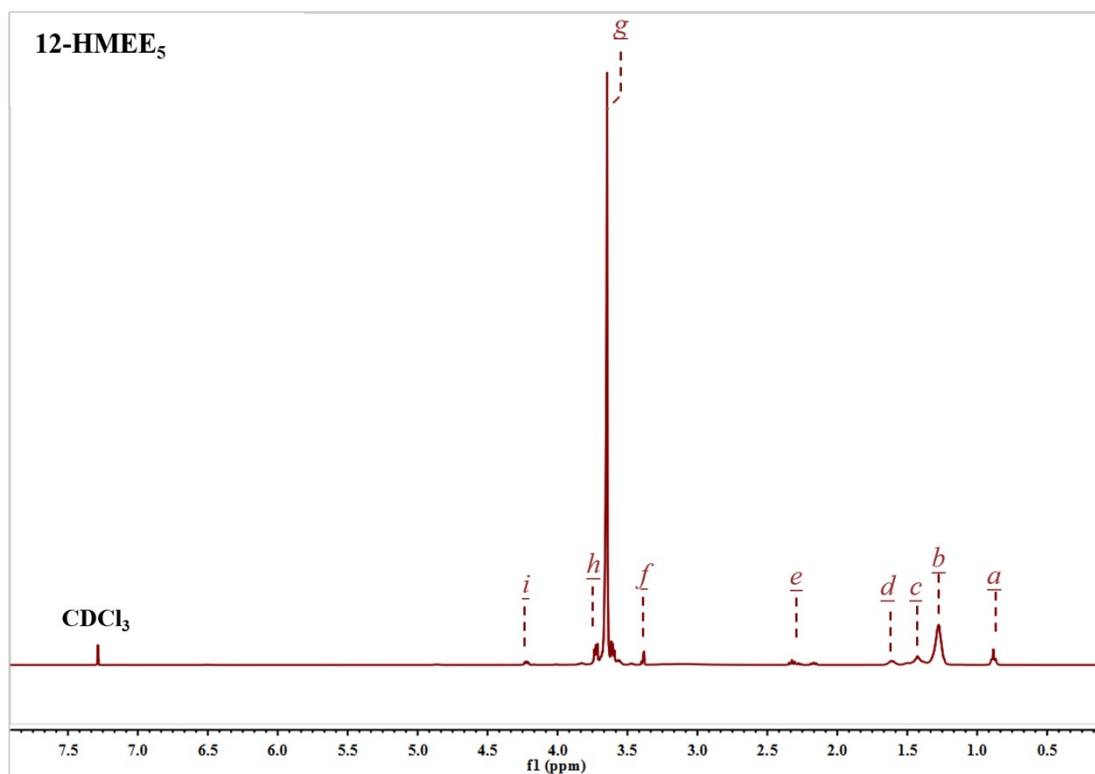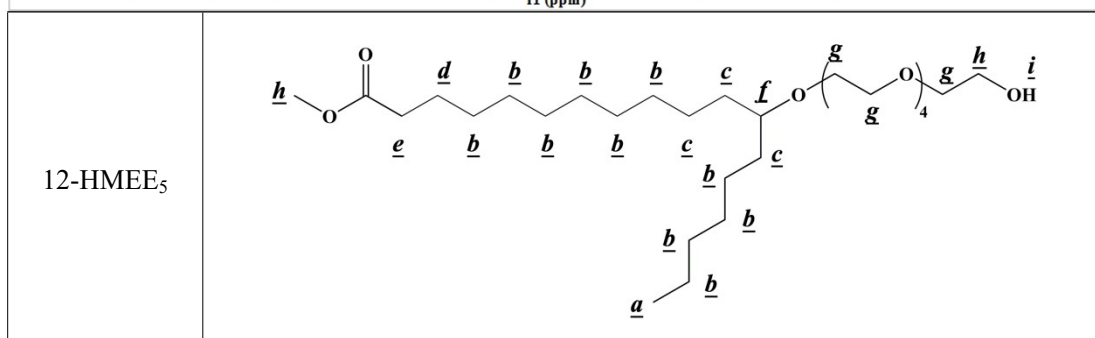

| <i>Entry</i> | <i>Location of <sup>1</sup>H NMR Peak</i> | <i>Chemical Shift</i> | <i>Integral</i> |
|--------------|-------------------------------------------|-----------------------|-----------------|
| 1            | <u>a</u>                                  | 0.87                  | 3H              |
| 2            | <u>b</u>                                  | 1.25                  | 20H             |
| 3            | <u>c</u>                                  | 1.54 - 1.35           | 6H              |
| 4            | <u>d</u>                                  | 1.58                  | 2H              |
| 5            | <u>e</u>                                  | 2.39 - 2.11           | 2H              |
| 6            | <u>f</u>                                  | 3.42 - 3.33           | 1H              |
| 7            | <u>g</u>                                  | 3.65 - 3.58           | 18H             |
| 8            | <u>h</u>                                  | 3.77 - 3.65           | 5H              |
| 9            | <u>i</u>                                  | 4.39 - 4.11           | 1H              |

SI-5.  $^1\text{H}$  NMR spectrum of 12-HMEE<sub>10</sub>.

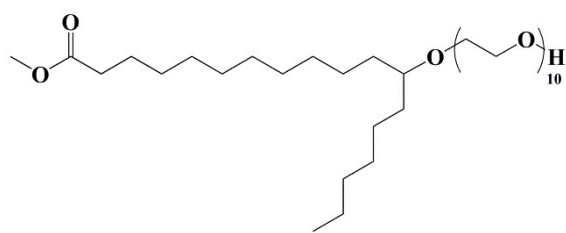

$^1\text{H}$  NMR in  $\text{CDCl}_3$

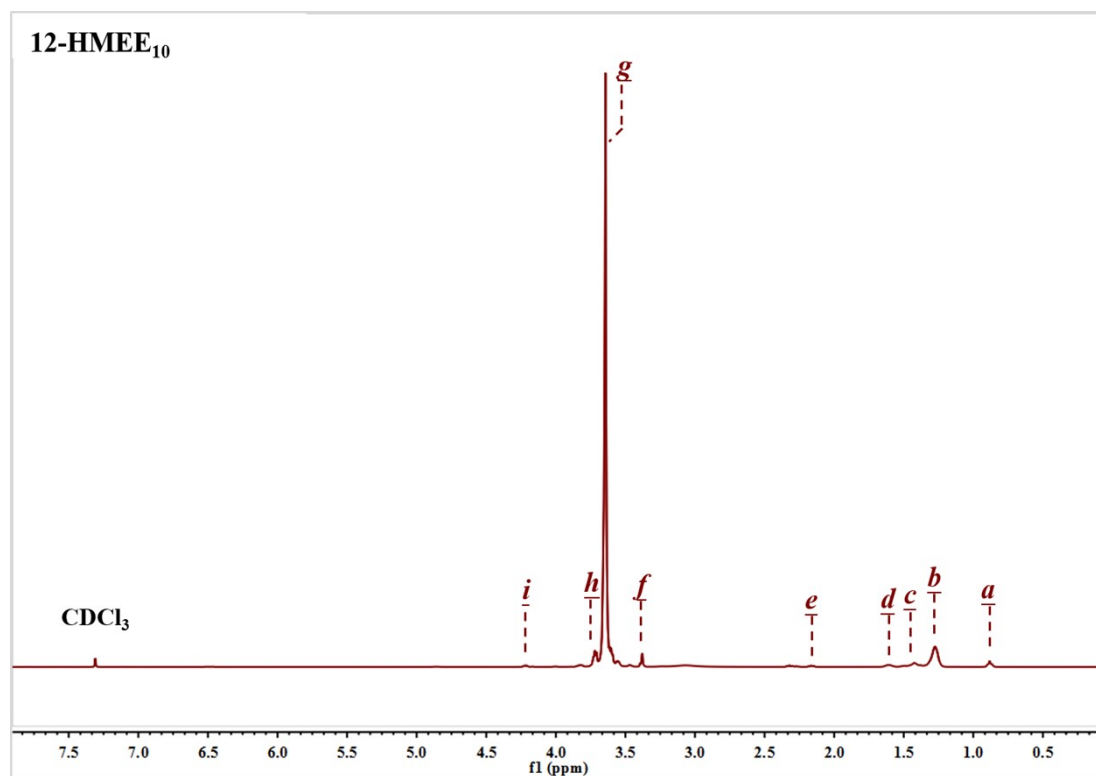

| Entry | Location of $^1\text{H}$ NMR Peak | Chemical Shift | Integral |
|-------|-----------------------------------|----------------|----------|
| 1     | <u>a</u>                          | 0.87           | 3H       |
| 2     | <u>b</u>                          | 1.27           | 20H      |
| 3     | <u>c</u>                          | 1.42           | 6H       |
| 4     | <u>d</u>                          | 1.58           | 2H       |
| 5     | <u>e</u>                          | 2.43 - 2.12    | 2H       |

|   |          |             |     |
|---|----------|-------------|-----|
| 6 | <i>f</i> | 3.38        | 1H  |
| 7 | <i>g</i> | 3.68 – 3.57 | 38H |
| 8 | <i>h</i> | 3.75 – 3.68 | 5H  |
| 9 | <i>i</i> | 4.32 – 4.14 | 1H  |

SI-6. <sup>1</sup>H NMR spectrum of 12-HMEE<sub>15</sub>.

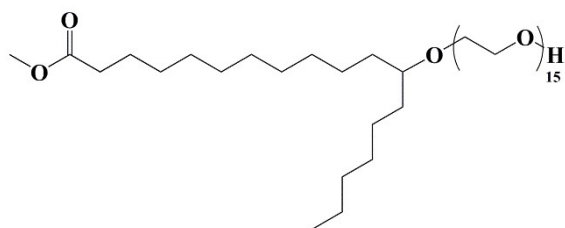

<sup>1</sup>H NMR in CDCl<sub>3</sub>

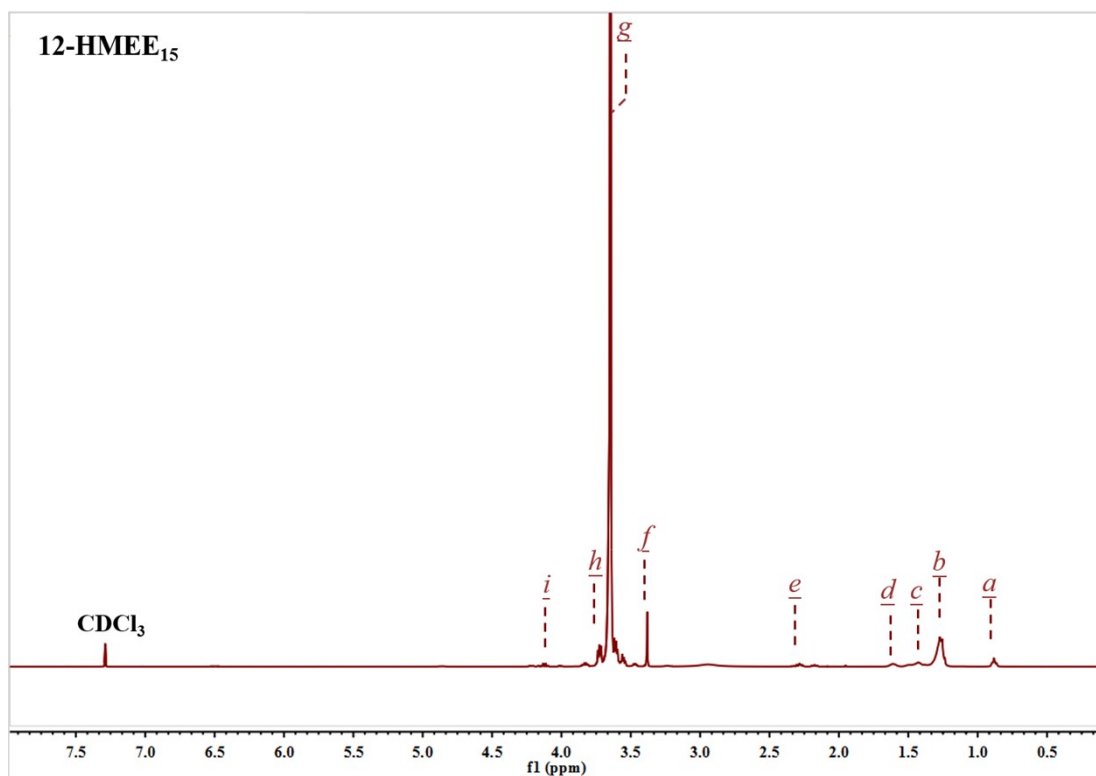

|                       |                                           |                       |                 |
|-----------------------|-------------------------------------------|-----------------------|-----------------|
| 12-HMEE <sub>15</sub> |                                           |                       |                 |
| <i>Entry</i>          | <i>Location of <sup>1</sup>H NMR Peak</i> | <i>Chemical Shift</i> | <i>Integral</i> |

|   |          |             |     |
|---|----------|-------------|-----|
| 1 | <i>a</i> | 0.88        | 3H  |
| 2 | <i>b</i> | 1.26        | 20H |
| 3 | <i>c</i> | 1.53 - 1.36 | 6H  |
| 4 | <i>d</i> | 1.68 - 1.54 | 2H  |
| 5 | <i>e</i> | 2.36 - 2.22 | 2H  |
| 6 | <i>f</i> | 3.39        | 1H  |
| 7 | <i>g</i> | 3.65        | 58H |
| 8 | <i>h</i> | 3.71        | 5H  |
| 9 | <i>i</i> | 4.24 - 4.08 | 1H  |

SI-7.  $^1\text{H}$  NMR spectrum of 12-HMEE<sub>20</sub>.

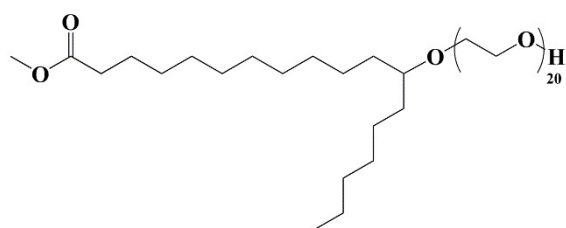

$^1\text{H}$  NMR in  $\text{CDCl}_3$

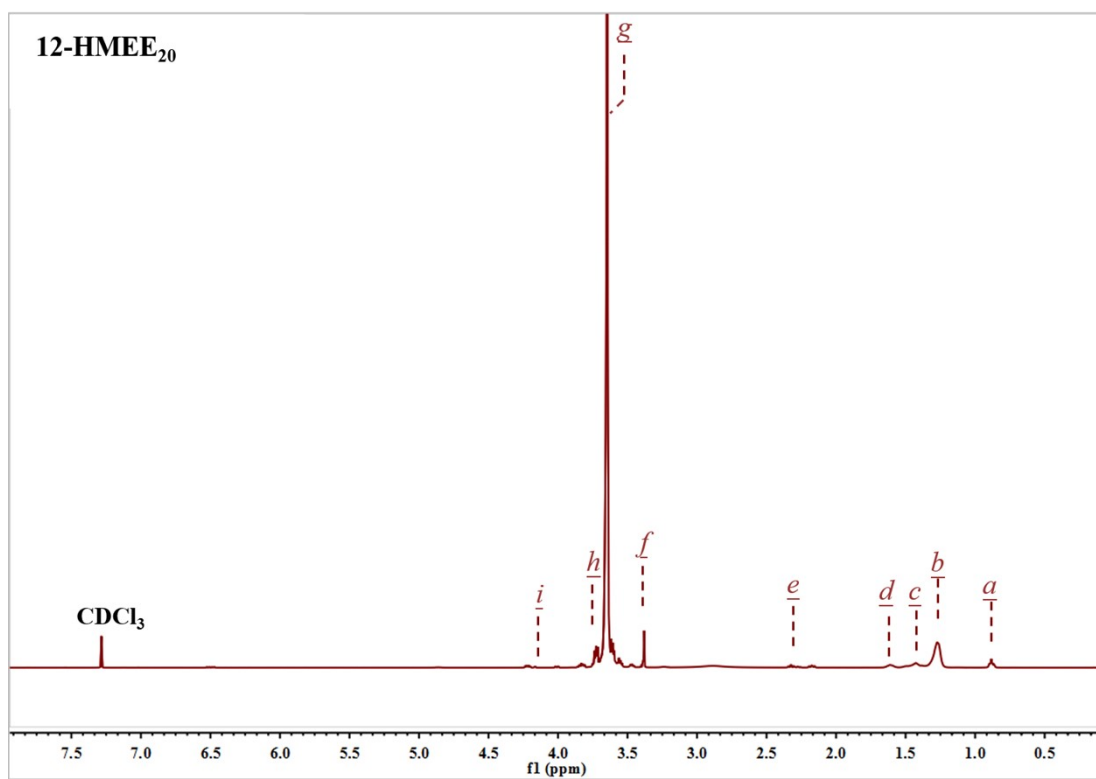



| 12-HMEE <sub>20</sub> | 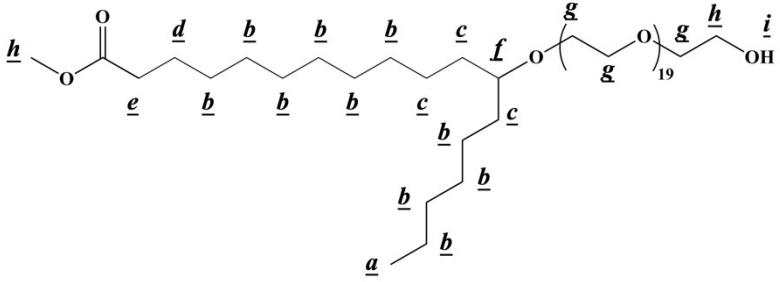 |                       |                 |
|-----------------------|------------------------------------------------------------------------------------|-----------------------|-----------------|
| <i>Entry</i>          | <i>Location of <sup>1</sup>H NMR Peak</i>                                          | <i>Chemical Shift</i> | <i>Integral</i> |
| 1                     | <u>a</u>                                                                           | 0.88                  | 3H              |
| 2                     | <u>b</u>                                                                           | 1.27                  | 20H             |
| 3                     | <u>c</u>                                                                           | 1.44                  | 6H              |
| 4                     | <u>d</u>                                                                           | 1.61                  | 2H              |
| 5                     | <u>e</u>                                                                           | 2.39 – 2.09           | 2H              |
| 6                     | <u>f</u>                                                                           | 3.43 – 3.33           | 1H              |
| 7                     | <u>g</u>                                                                           | 3.69 – 3.58           | 78H             |
| 8                     | <u>h</u>                                                                           | 3.77 – 3.69           | 5H              |
| 9                     | <u>i</u>                                                                           | 4.30 – 4.08           | 1H              |

SI-8. Equilibrium surface tension of 12-HMEE<sub>n</sub>.

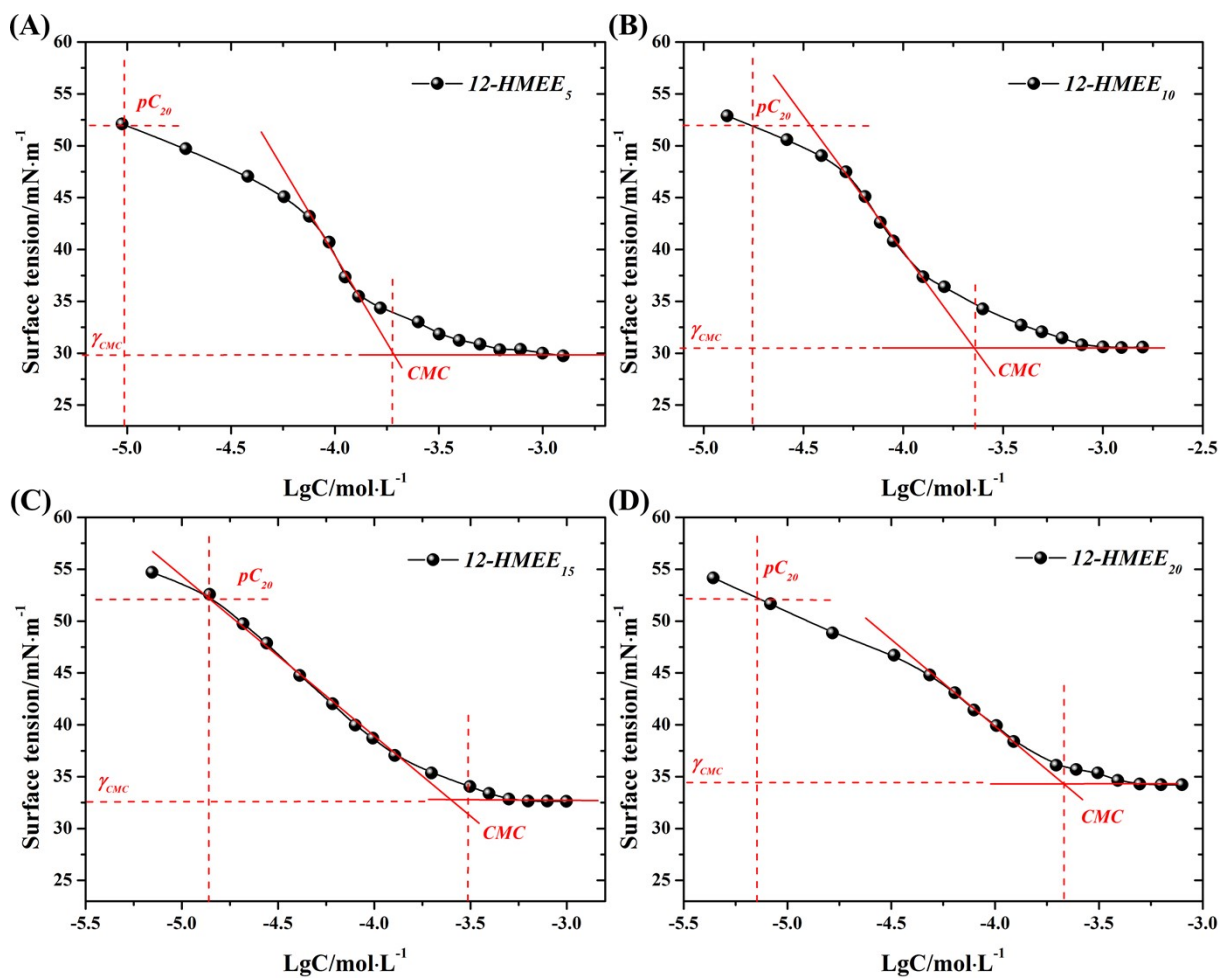

Fig. S3 Equilibrium surface tension of 12-HMEE<sub>n</sub>: (A) 12-HMEE<sub>5</sub>; (B) 12-HMEE<sub>10</sub>; (C) 12-HMEE<sub>15</sub>; (D) 12-HMEE<sub>20</sub>.

SI-9. Dynamic surface tension as a function of short-term ( $t^{1/2}$ ) for the 12-HMEE<sub>n</sub>.

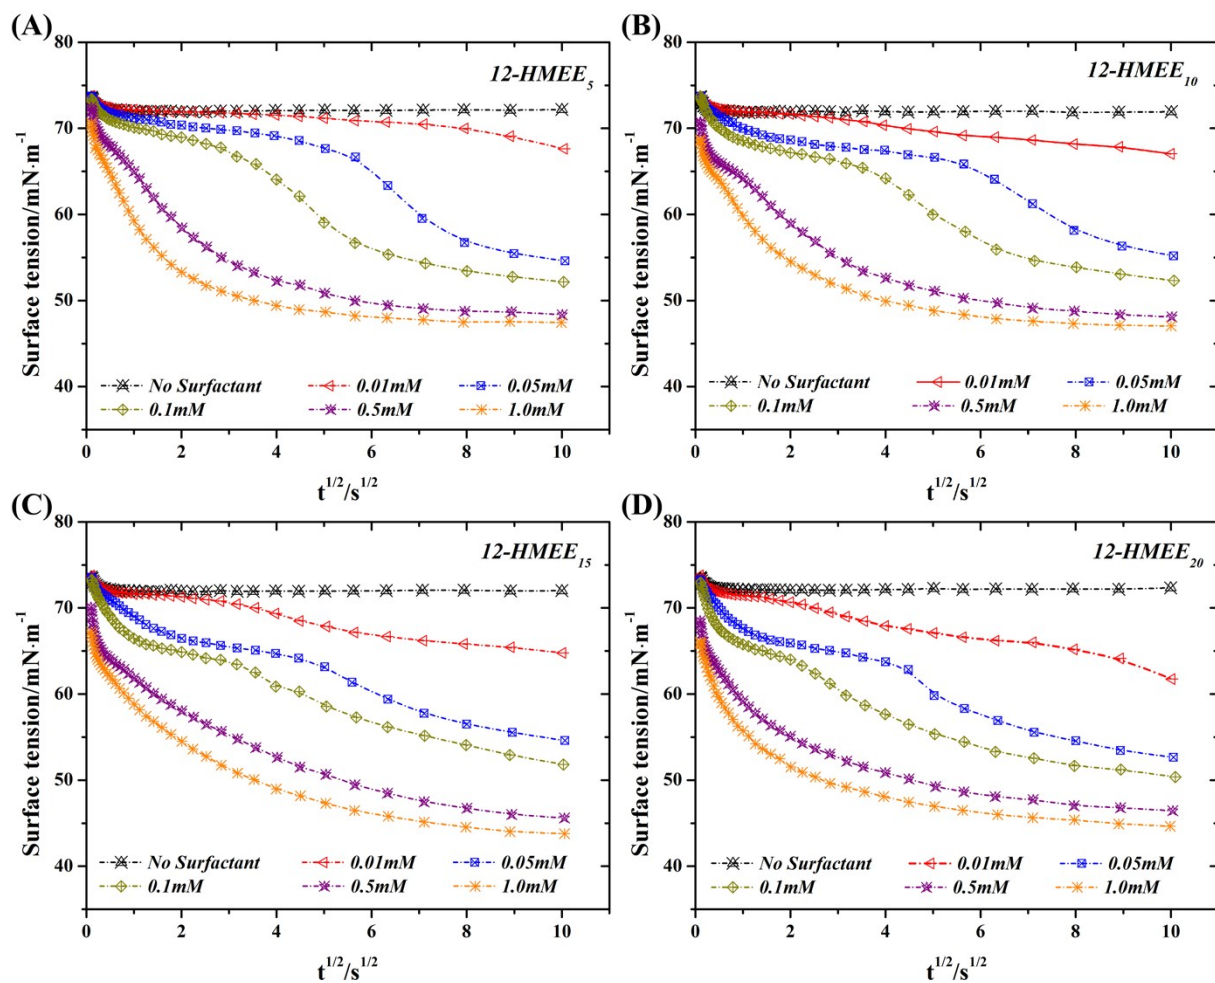

Fig. S4 Short-term dynamic surface tension ( $t^{1/2}$ ) of 12-HMEE<sub>n</sub>: (A) 12-HMEE<sub>5</sub>; (B) 12-HMEE<sub>10</sub>; (C) 12-HMEE<sub>15</sub>; (D) 12-HMEE<sub>20</sub>.

SI-10. Dynamic surface tension as a function of long-term ( $t^{-1/2}$ ) for the 12-HMEE $_n$ .

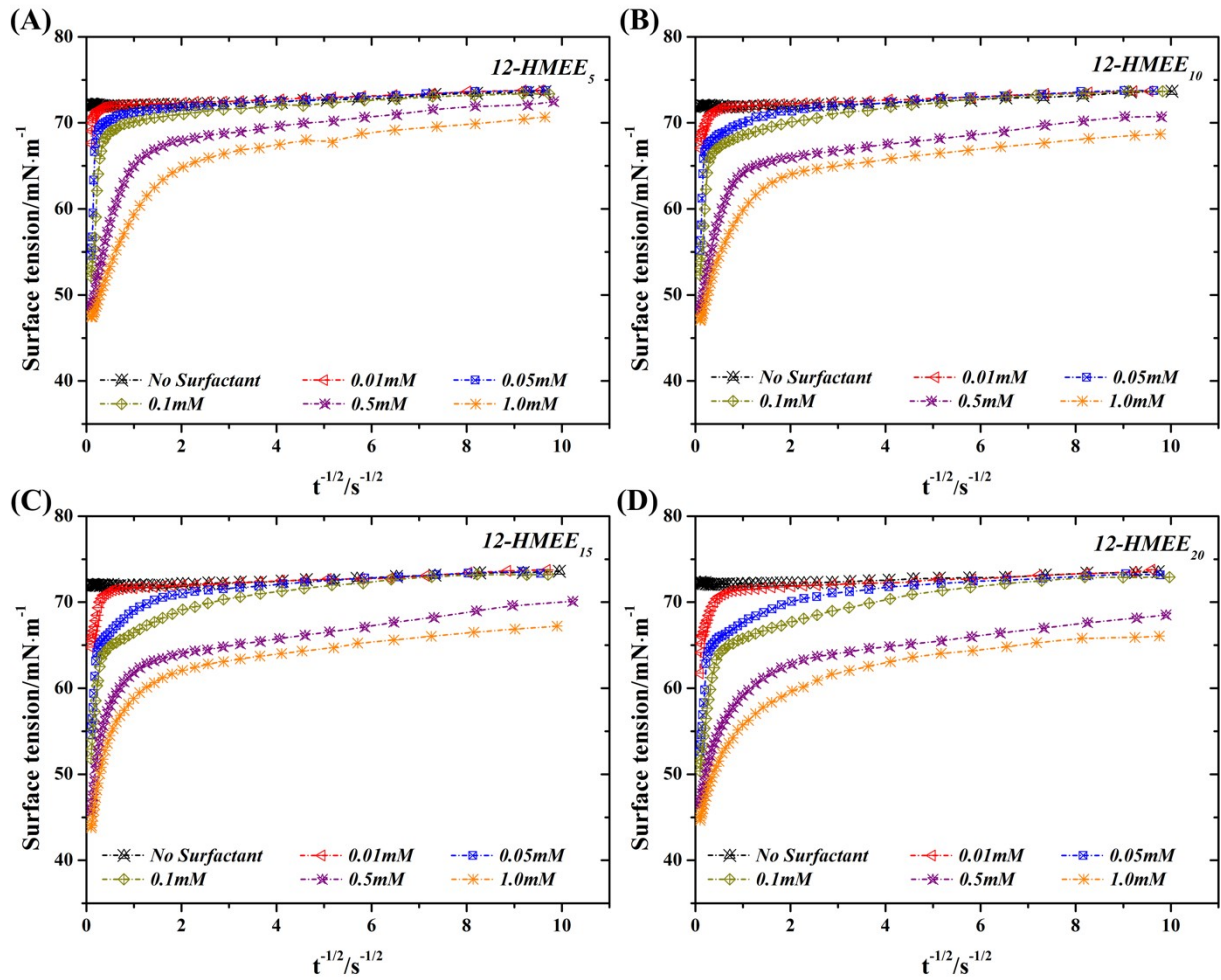

Fig. S5 Long-term dynamic surface tension ( $t^{-1/2}$ ) of 12-HMEE $_n$ : (A) 12-HMEE $_5$ ; (B) 12-HMEE $_{10}$ ; (C) 12-HMEE $_{15}$ ; (D) 12-HMEE $_{20}$ .
